# Supplementary material
Source: PubMed Central journal article supplement (PMC6140568)
Supplement: CJN.04060318SupplementaryData.pdf [file CJN.04060318SupplementaryData.pdf]

*Supplemental material is neither peer-reviewed nor thoroughly edited by CJASN. The authors alone are responsible for the accuracy and presentation of the material.*

## **Supplemental material**

### **Incident Atrial Fibrillation and the Risk of Stroke in Adults with Chronic Kidney Disease: The Stockholm CREatinine Measurements (SCREAM) Project**

| Contents                                                                 |                                                 | Page |
|--------------------------------------------------------------------------|-------------------------------------------------|------|
| Figure S1. Flowchart                                                     |                                                 | 2    |
| Table S1. Study definitions                                              | a) co-morbidities                               | 3    |
|                                                                          | b) use of medication                            | 4    |
|                                                                          | c) outcomes                                     | 4    |
|                                                                          | d) CHA <sub>2</sub> DS <sub>2</sub> -VAsC-score | 4    |
| Table S2. Stepwise Cox regression model for the outcome all-cause stroke |                                                 | 5    |

**Figure S1.** Flow chart

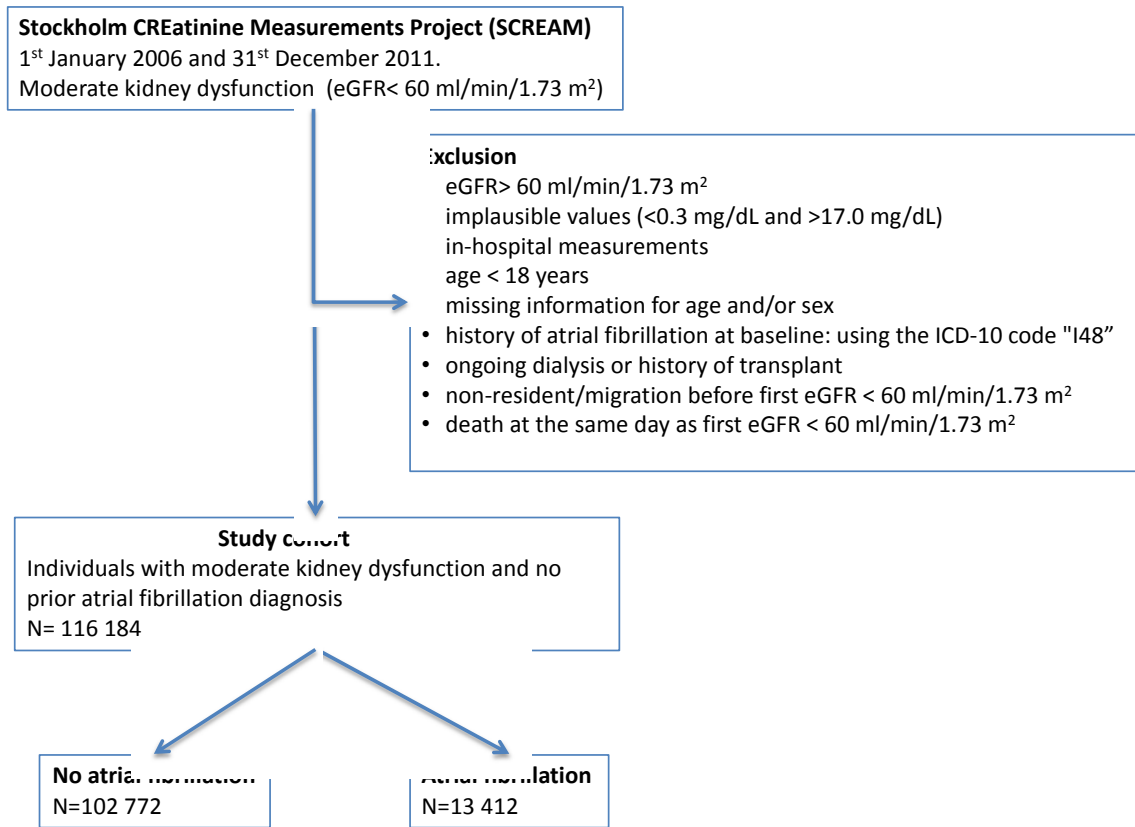

Supplemental material is neither peer-reviewed nor thoroughly edited by CJASN. The authors alone are responsible for the accuracy and presentation of the material.

**Table S1.** Study definitions including a) co-morbidities, b) use of medication; c) outcomes; and d) CHA<sub>2</sub>DS<sub>2</sub>-VASc-score.

a) Co-morbidities

| Comorbidity                                            | International Classification of Diseases 10th Revision (ICD-10) codes                                                                                |
|--------------------------------------------------------|------------------------------------------------------------------------------------------------------------------------------------------------------|
| Stroke, transient ischemic attack or systemic embolism | I63, I64, I69, G45, I74                                                                                                                              |
| Gastrointestinal bleeding                              | K226, K250, K252, K254, K256, K260, K262, K264, K266, K270, K272, K274, K276, K280, K282, K284, K286, K290, K625, K661, K920, K921, K922, I850, I983 |
| Urogenital bleeding                                    | N02, R319, N939, N950, N501A                                                                                                                         |
| Other bleeding                                         | H113, H313, H356, H431, H450, H922, I312, J942, M250, R04, R58, T810, D500, D629                                                                     |
| Transfusion                                            | DR029, DR033, Z513                                                                                                                                   |
| Hypertension                                           | I10-15                                                                                                                                               |
| Diabetes                                               | E10-14, purchase of antidiabetic drugs (ATC: A10) within 5 months up to 1 month after index date                                                     |
| Vascular disease                                       | I21, I252, I70-73                                                                                                                                    |
| Myocardial infarction                                  | I21, I252                                                                                                                                            |
| Ischemic heart disease                                 | I20-25                                                                                                                                               |
| Percutaneous coronary intervention                     | Procedure code FNG                                                                                                                                   |
| Coronary artery by-pass grafting                       | Procedure codes FNA, FNB, FNC, FND, FNE, FNF, FNH, FNI, FNK, FNW                                                                                     |
| Peripheral arterial disease                            | I70-73                                                                                                                                               |
| Pulmonary embolism                                     | I26                                                                                                                                                  |
| Deep venous thrombosis                                 | I801, I802                                                                                                                                           |
| Composite venous thromboembolism                       | I26, I801, I802                                                                                                                                      |
| Coagulation or platelet defect                         | D65-69                                                                                                                                               |
| Valvular atrial fibrillation                           | I342, I050, I052, Q232, Z952, Z954 or procedure codes FG, FJE, FJF, FK, FM                                                                           |
| Other valvular disease                                 | I34-39 (except I342)                                                                                                                                 |
| Aortic stenosis                                        | I350, I352                                                                                                                                           |
| Aortic insufficiency                                   | I351, I352                                                                                                                                           |
| Rheumatic aortic disease                               | I060-062                                                                                                                                             |
| Mitral insufficiency                                   | I340                                                                                                                                                 |
| Mitral stenosis non-rheumatic                          | I342                                                                                                                                                 |
| Rheumatic mitral stenosis                              | I050-052                                                                                                                                             |
| Phrosthetic heart valve (Biological)                   | Z953                                                                                                                                                 |
| Phrosthetic heart valve (Mechanic)                     | Z952                                                                                                                                                 |
| Pacemaker or implantable cardiac defibrillator         | Z950, Z450, procedure code FPE                                                                                                                       |
| Renal Failure                                          | N18, N19                                                                                                                                             |
| Liver disease                                          | K70-77, procedure codes JJB, JJC                                                                                                                     |
| Thyroid disease                                        | E00-07                                                                                                                                               |
| Chronic obstructive pulmonary disease                  | J43, J44                                                                                                                                             |
| Cancer                                                 | any diagnosis in the domain C within the previous 3 years                                                                                            |
| Alcohol use                                            | E244, F10, G312, G621, G721, I426, K292, K70, K860, 0354, P043, Q860, T51, Y90, Y91, Z502, Z714                                                      |
| Dementia                                               | F00-03                                                                                                                                               |

Supplemental material is neither peer-reviewed nor thoroughly edited by CJASN. The authors alone are responsible for the accuracy and presentation of the material.

## b) Medications

| Medication                                   | Anatomical Therapeutic Chemical (ATC) Classification System codes |
|----------------------------------------------|-------------------------------------------------------------------|
| Aspirin                                      | B01AC06                                                           |
| Dipyridamole                                 | B01AC07                                                           |
| Combination of aspirin and dipyridamole      | B01AC30                                                           |
| Clopidogrel                                  | B01AC04                                                           |
| Statins                                      | C10AA                                                             |
| Amiodarone                                   | C01BD01                                                           |
| Ticagrelor                                   | B01AC24                                                           |
| Non-steroidal anti-inflammatory drugs        | M01A                                                              |
| Ticlopidine                                  | B01AC05                                                           |
| Prasugrel                                    | B01AC22                                                           |
| Macrolides                                   | J01FA                                                             |
| Quinolone                                    | J01M                                                              |
| Dronedarone                                  | C01BD07                                                           |
| Selective serotonin re-uptake inhibitors     | N06AB                                                             |
| Proton pump inhibitors                       | A02BC                                                             |
| -Azole antibiotics                           | J02AB, J02BC                                                      |
| Paracetamol                                  | N02BE01                                                           |
| Combination of sulfonamides and trimethoprim | J01EE                                                             |
| Metrodinazole                                | J01XD01                                                           |

## c) Study outcomes

| Outcome                | ICD-10 code             | Source of information                                              |
|------------------------|-------------------------|--------------------------------------------------------------------|
| All cause Stroke       | I60-64                  | *Hospitalization or death                                          |
| Ischemic Stroke        | I63                     | *Hospitalization or death                                          |
| Intracerebral Bleeding | I60, I61                | *Hospitalization or death                                          |
| Intracranial Bleeding  | I62, S064-066, I60, I61 | *Hospitalization or death                                          |
| Death                  |                         | First or second cause of death in the National Population registry |

\* Principal and first secondary diagnosis issued at a discharge hospitalization anytime since the inception of the ICD-10<sup>th</sup> version in Sweden (1997).

## d) CHA<sub>2</sub>DS<sub>2</sub>-VASc score

| CHA <sub>2</sub> DS <sub>2</sub> -VASc                 | Score |
|--------------------------------------------------------|-------|
| Age ≥ 65 and < 75                                      | 1     |
| Age ≥ 75                                               | 2     |
| Female sex                                             | 1     |
| Heart failure                                          | 1     |
| Hypertension                                           | 1     |
| Stroke, Transient ischemic attack or systemic embolism | 2     |
| Vascular disease                                       | 1     |

**Table S2.** Stepwise Cox regression model for the outcome all-cause stroke

|            | Model 1*<br>Hazard ratio (95% CI) | Model 2**<br>Hazard ratio (95% CI) |
|------------|-----------------------------------|------------------------------------|
| eGFR 45-60 | 2.03 (1.88-2.18)                  | 2.09 (1.93-2.26)                   |
| eGFR 30-44 | 1.84 (1.64-2.06)                  | 1.88 (1.67-2.11)                   |
| eGFR <30   | 1.83 (1.47-2.27)                  | 1.86 (1.50-2.31)                   |
|            |                                   |                                    |

eGFR: estimated Glomerular Filtration Rate (ml/min/1.73m<sup>2</sup>)

\* Model 1: Adjustments were made for: age, sex, eGFR (ml/min/1.73m<sup>2</sup>), history of intracranial bleeding, history of heart failure, anemia, hypertension, diabetes, vascular disease, prior history of stroke, percutaneous coronary intervention, coronary artery by-pass grafting, peripheral arterial disease, pulmonary embolism, deep venous thrombosis, valvular disease, liver disease, thyroid disease, chronic obstructive pulmonary disease, cancer, alcohol abuse, dementia, aspirin, clopidogrel, selective serotonin re-uptake inhibitors and proton pump inhibitors.

\*\* Model 2: as for model 1, and warfarin use.
